# Supplementary material for: Effect of process parameters on hydrothermal liquefaction of waste furniture sawdust for bio-oil production
Source: Royal Society of Chemistry journal article supplement (doi:10.1039/c6ra02868c), 2016-01-01
Supplement: c6ra02868c1.pdf [file c6ra02868c1.pdf]

**Jindal and Jha, Supplementary Data**

**Table S1**

Effect of reaction temperature on products distribution from HTL of waste furniture sawdust (Conditions: 10 g of sawdust with 60 ml water, residence time of 15 min, and 1.0 MPa N<sub>2</sub> initial pressure).

| Reaction Temperature (°C) | Conversion <sup>a</sup> (wt%) | LBO <sup>b</sup> (wt%) | HBO <sup>c</sup> (wt%) | TBO (wt%) | SR <sup>d</sup> (wt%) | WS <sup>e</sup> (wt%) | Gas <sup>f</sup> (wt%) |
|---------------------------|-------------------------------|------------------------|------------------------|-----------|-----------------------|-----------------------|------------------------|
| 180                       | 37.5                          | 1.2                    | 3.4                    | 4.6       | 62.5                  | 26.2                  | 6.7                    |
| 200                       | 45.2                          | 2.4                    | 5.2                    | 7.6       | 54.8                  | 27.9                  | 9.7                    |
| 220                       | 51.3                          | 3.5                    | 6.4                    | 9.9       | 48.7                  | 29.3                  | 12.1                   |
| 240                       | 57.8                          | 4.1                    | 6.8                    | 10.9      | 45.2                  | 30.2                  | 13.7                   |
| 260                       | 59.8                          | 5.7                    | 6.2                    | 11.9      | 41.9                  | 31.3                  | 14.9                   |
| 280 <sup>g</sup>          | 61.6                          | 5.2                    | 7.5                    | 12.7      | 38.4                  | 32.1                  | 16.8                   |
| 300                       | 60.8                          | 4.8                    | 7.3                    | 12.1      | 39.2                  | 30.7                  | 18.0                   |

<sup>a</sup>See Eq. 2

<sup>b</sup>See Eq. 3

<sup>c</sup>See Eq. 4

<sup>d</sup>See Eq. 5

<sup>e</sup>See Eq. 6

<sup>f</sup>See Eq. 7

<sup>g</sup>The results at 280°C were taken from the literature [1] for comparison.

**Table S2**

Effect of residence time on products distribution from HTL of waste furniture sawdust (Conditions: reaction temperature 280°C, 10 g of sawdust with 60 ml water, and 1.0 MPa N<sub>2</sub> initial pressure).

| <b>Residence Time (min)</b> | <b>Conversion<sup>a</sup> (wt%)</b> | <b>LBO<sup>b</sup> (wt%)</b> | <b>HBO<sup>c</sup> (wt%)</b> | <b>TBO (wt%)</b> | <b>SR<sup>d</sup> (wt%)</b> | <b>WS<sup>e</sup> (wt%)</b> | <b>Gas<sup>f</sup> (wt%)</b> |
|-----------------------------|-------------------------------------|------------------------------|------------------------------|------------------|-----------------------------|-----------------------------|------------------------------|
| 0                           | 59.1                                | 2.4                          | 4.8                          | 7.2              | 40.9                        | 36.2                        | 15.7                         |
| 15 <sup>g</sup>             | 61.6                                | 5.2                          | 7.5                          | 12.7             | 38.4                        | 32.1                        | 16.8                         |
| 30                          | 62.1                                | 4.2                          | 6.2                          | 10.4             | 37.9                        | 30.8                        | 20.9                         |
| 60                          | 59.8                                | 3.4                          | 4.8                          | 8.2              | 40.2                        | 29.7                        | 21.9                         |

<sup>a</sup>See Eq. 2

<sup>b</sup>See Eq. 3

<sup>c</sup>See Eq. 4

<sup>d</sup>See Eq. 5

<sup>e</sup>See Eq. 6

<sup>f</sup>See Eq. 7

<sup>g</sup>The results at 15 min were taken from the literature [1] for comparison.

**Table S3**

Effect of ratio of the water/sawdust on products distribution from HTL of waste furniture sawdust (Conditions: reaction temperature 280°C, 10 g sawdust, and initial N<sub>2</sub> pressure of 1.0 MPa for 15 min).

| <b>Water/sawdust ratio (ml/gm)</b> | <b>Conversion<sup>a</sup> (wt%)</b> | <b>LBO<sup>b</sup> (wt%)</b> | <b>HBO<sup>c</sup> (wt%)</b> | <b>TBO (wt%)</b> | <b>SR<sup>d</sup> (wt%)</b> | <b>WS<sup>e</sup> (wt%)</b> | <b>Gas<sup>f</sup> (wt%)</b> |
|------------------------------------|-------------------------------------|------------------------------|------------------------------|------------------|-----------------------------|-----------------------------|------------------------------|
| 2                                  | 57.7                                | 1.4                          | 2.3                          | 3.7              | 42.3                        | 35.7                        | 18.3                         |
| 4                                  | 58.2                                | 2.6                          | 4.3                          | 6.9              | 41.8                        | 34.2                        | 17.1                         |
| 6 <sup>g</sup>                     | 61.6                                | 5.2                          | 7.5                          | 12.7             | 38.4                        | 32.1                        | 16.8                         |
| 8                                  | 59.8                                | 4.2                          | 6.4                          | 10.6             | 40.2                        | 34.9                        | 14.3                         |
| 10                                 | 59.2                                | 3.8                          | 5.8                          | 9.6              | 40.8                        | 39.7                        | 9.9                          |

<sup>a</sup>See Eq. 2

<sup>b</sup>See Eq. 3

<sup>c</sup>See Eq. 4

<sup>d</sup>See Eq. 5

<sup>e</sup>See Eq. 6

<sup>f</sup>See Eq. 7

<sup>g</sup>The results at water/sawdust ratio of 6 were taken from the literature [1] for comparison.

**Table S4**

Effect of initial N<sub>2</sub> pressure on products distribution from HTL of waste furniture sawdust (Conditions: reaction temperature 280°C, 10 g of sawdust with 60 ml water, and residence time of 15 min).

| <b>Initial N<sub>2</sub> pressure (MPa)</b> | <b>Conversion<sup>a</sup> (wt%)</b> | <b>LBO<sup>b</sup> (wt%)</b> | <b>HBO<sup>c</sup> (wt%)</b> | <b>TBO (wt%)</b> | <b>SR<sup>d</sup> (wt%)</b> | <b>WS<sup>e</sup> (wt%)</b> | <b>Gas<sup>f</sup> (wt%)</b> |
|---------------------------------------------|-------------------------------------|------------------------------|------------------------------|------------------|-----------------------------|-----------------------------|------------------------------|
| 0                                           | 59.8                                | 3.2                          | 5.6                          | 9.8              | 40.2                        | 26.2                        | 23.8                         |
| 0.5                                         | 60.9                                | 3.6                          | 5.8                          | 10.7             | 39.1                        | 29.1                        | 21.1                         |
| 1.0 <sup>g</sup>                            | 61.6                                | 5.2                          | 7.5                          | 12.7             | 38.4                        | 32.1                        | 16.8                         |
| 1.5                                         | 59.8                                | 4.8                          | 7.1                          | 11.9             | 40.2                        | 31.3                        | 16.6                         |
| 2.0                                         | 59.4                                | 4.6                          | 6.9                          | 11.5             | 40.6                        | 31.6                        | 16.3                         |

<sup>a</sup>See Eq. 2

<sup>b</sup>See Eq. 3

<sup>c</sup>See Eq. 4

<sup>d</sup>See Eq. 5

<sup>e</sup>See Eq. 6

<sup>f</sup>See Eq. 7

<sup>g</sup>The results at 1.0 MPa were taken from the literature [1] for comparison.

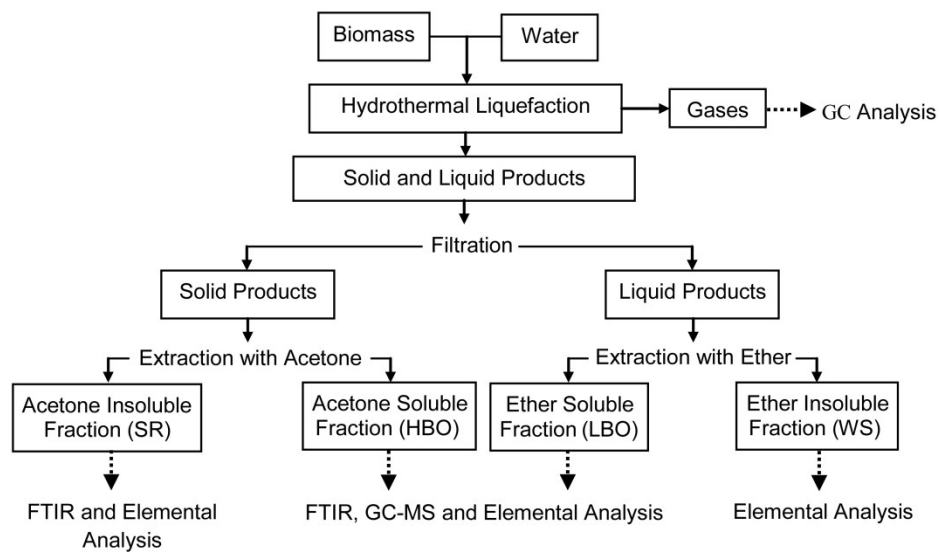

**Fig. S1** Separation and Extraction Procedure

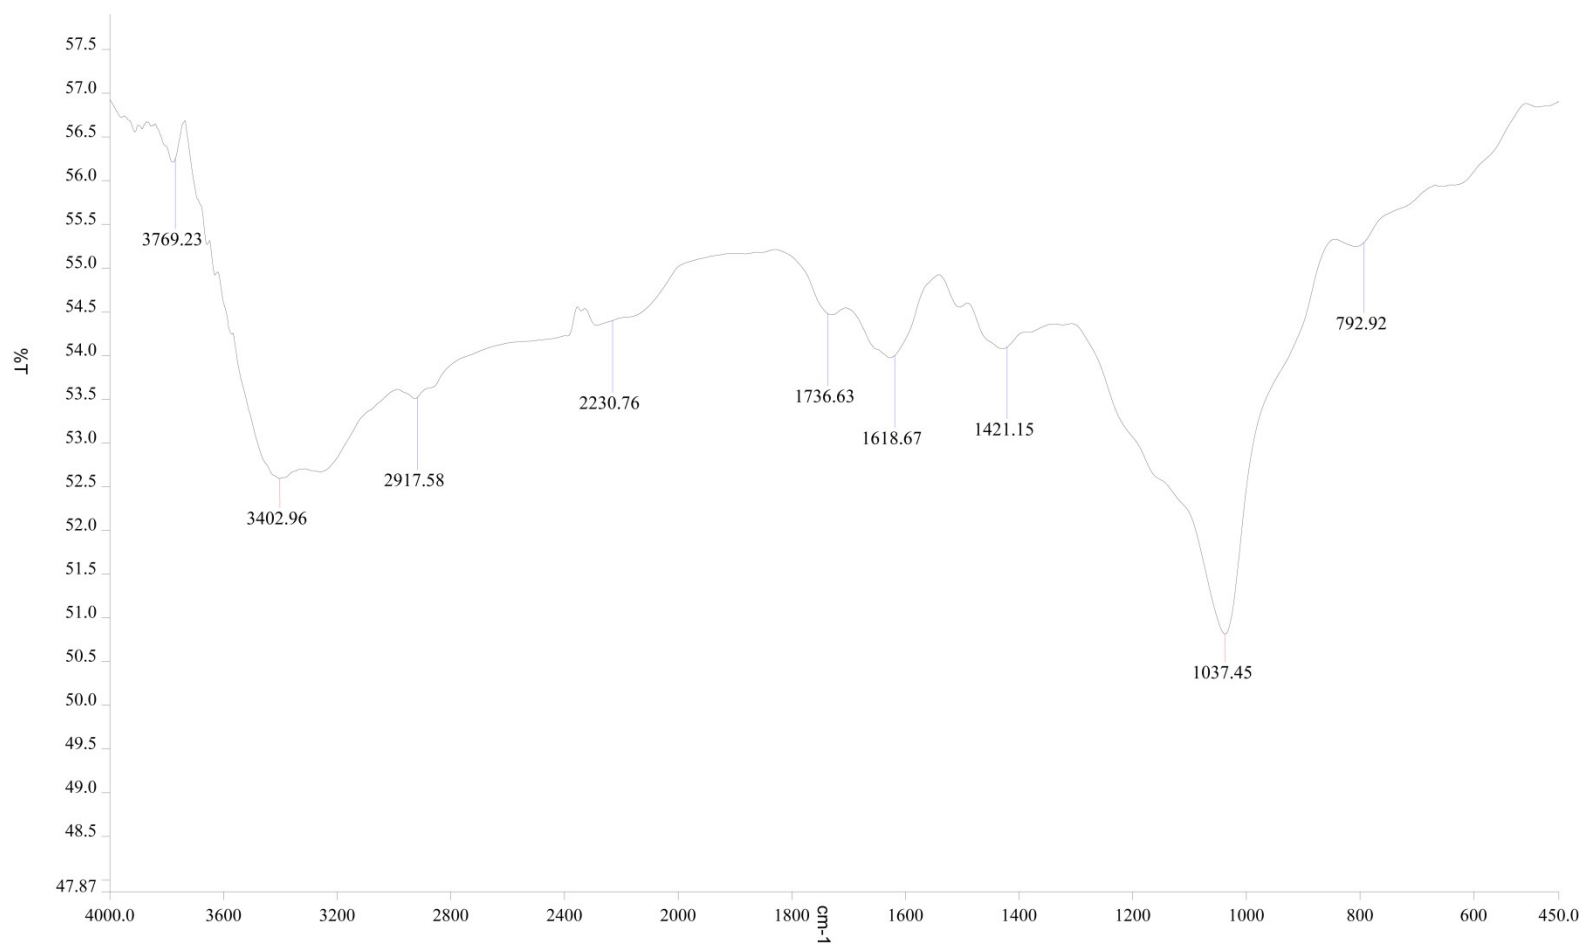

**Fig. S2** FTIR spectra of waste furniture sawdust

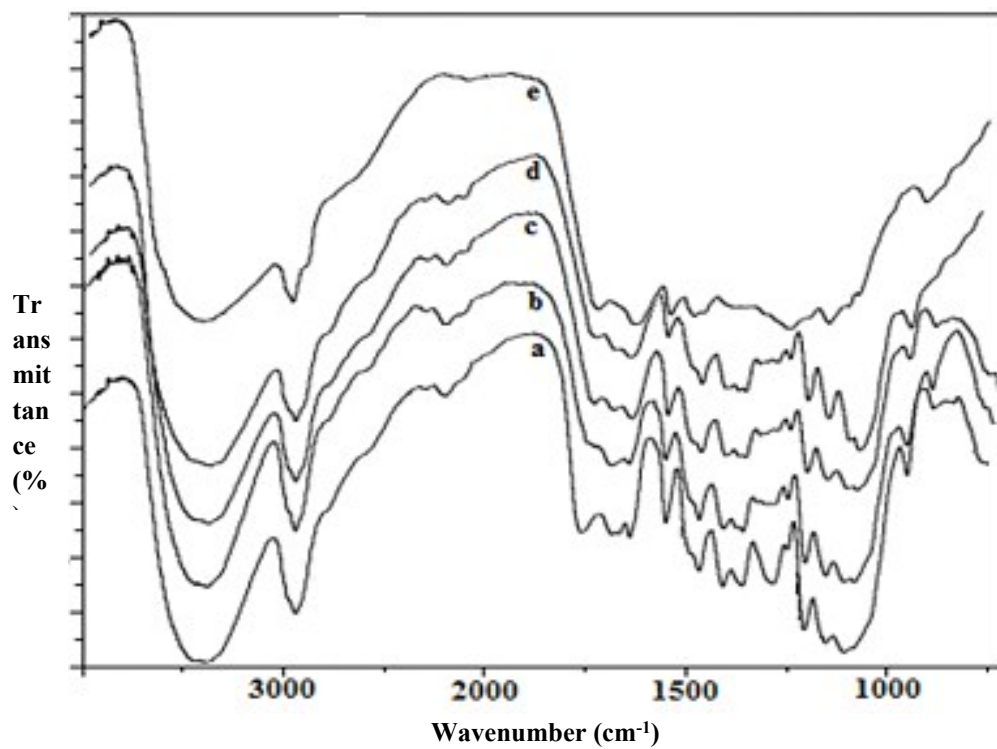

**Fig. S3** FT-IR spectra of solid residues (a-180°C, b-220°C, c-240°C, d-260°C, and e-280°C)

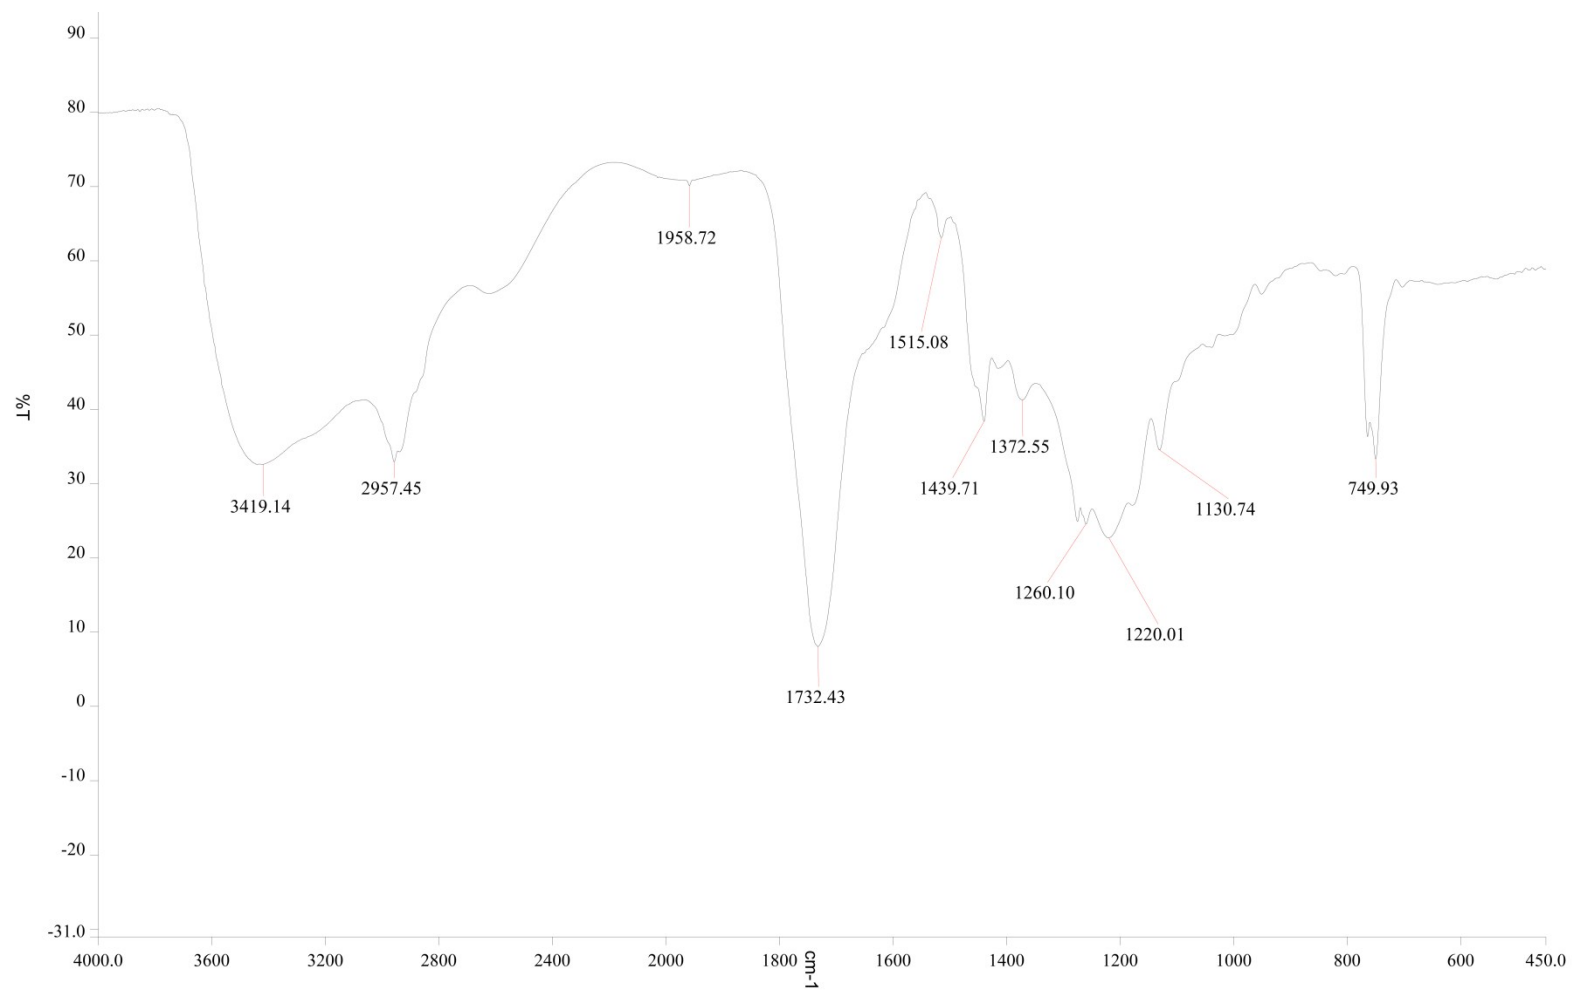

**Fig. S4** FTIR spectra of light bio-oil



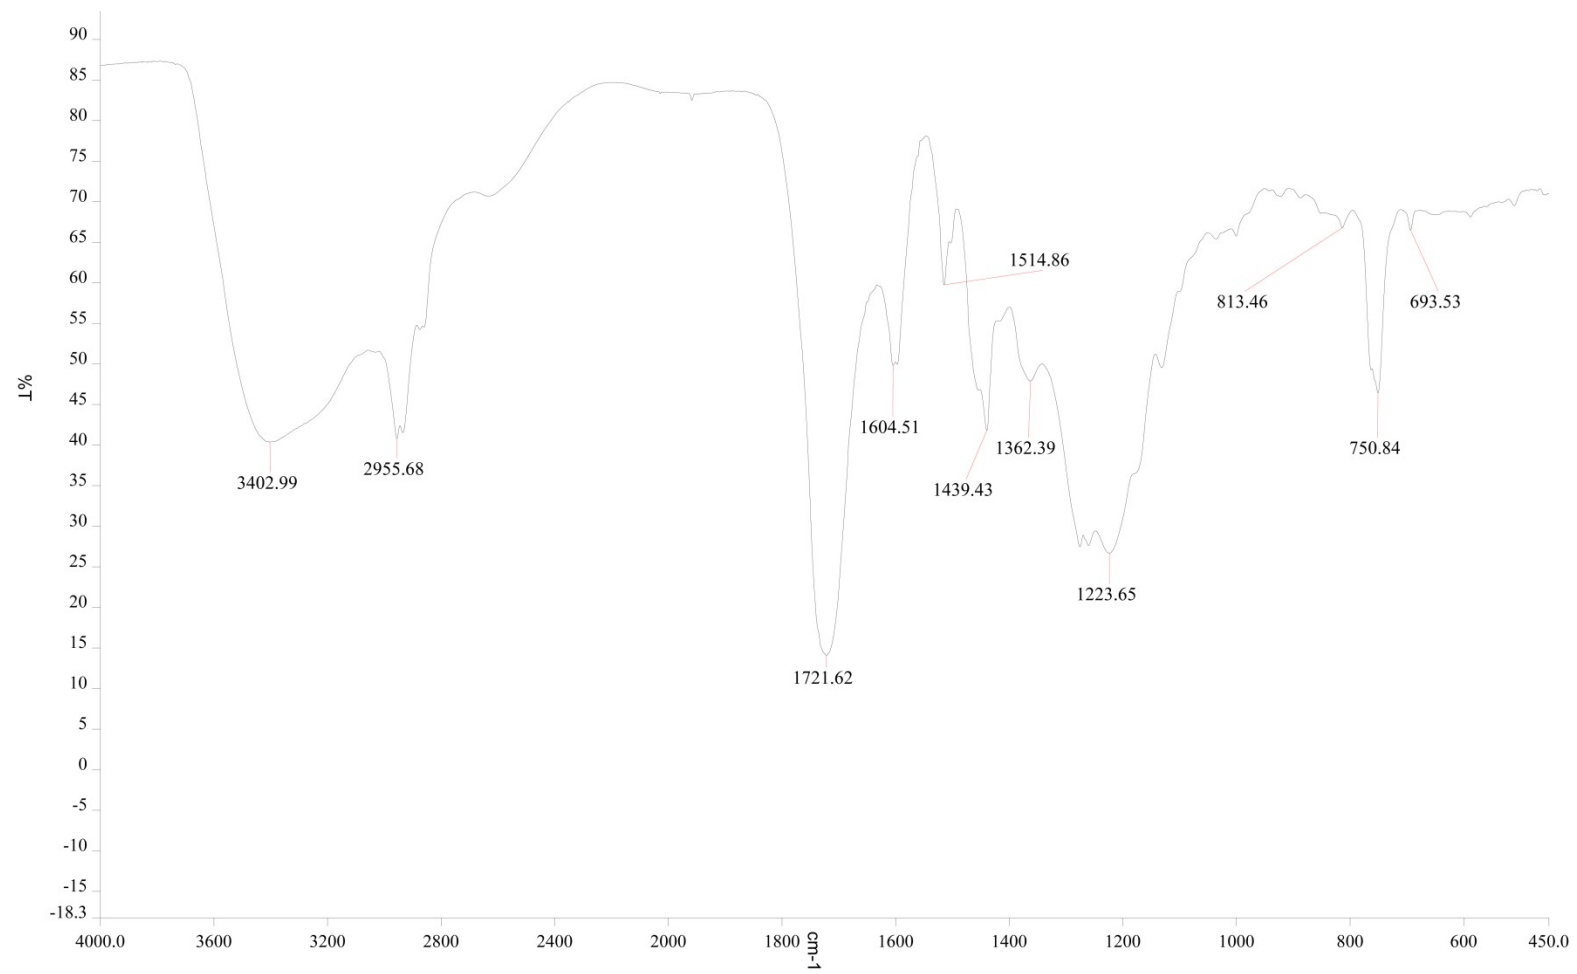

**Fig. S5** FTIR spectra of heavy bio-oil

## Reference

- [1] M. K. Jindal, and M. K. Jha, Catalytic Hydrothermal Liquefaction of Waste Furniture Sawdust to Bio-oil. *Indian Chemical Engineer*, 2015, DOI: 10.1080/00194506.2015.1006145.
